# Supplementary material for: The Treatment Intensity of Anticoagulant Therapy for Patients With Sepsis-Induced Disseminated Intravascular Coagulation and Outcomes: A Multicenter Cohort Study
Source: PubMed Central journal article supplement — Clin Appl Thromb Hemost. 2019 Mar 28;25:1076029619839154. doi: 10.1177/1076029619839154 (PMC6715020; doi:10.1177/1076029619839154), 2019-03-28
Supplement: CATHAppendix2_List_authors_082418_(1).pdf [file CATHAppendix2_List_authors_082418_%281%29.pdf]

## **Appendix 2**

### **List of the JSEPTIC DIC Study Investigators**

#### **Primary investigator**

Mineji Hayakawa 1)

#### **Core members**

Daisuke Kudo 2), Shigehiko Uchino 3), Kazuma Yamakawa 4), Shinjiro Saito 3), Yusuke Iizuka 5), Masamitsu Sanui 5), Kohei Takimoto 6), Toshihiko Mayumi 7)

#### **Members**

Kota Ono 8), Takeo Azuhata 9), Fumihito Ito 10), Shodai Yoshihiro 11), Katsura Hayakawa 12), Tsuyoshi Nakashima 13), Takayuki Ogura 14), Eiichiro Noda 15), Yoshihiko Nakamura 16), Ryosuke Sekine 17), Yoshiaki Yoshikawa 2), Motohiro Sekino 18), Keiko Ueno 19), Yuko Okuda 20), Masayuki Watanabe 21), Akihito Tampo 22), Nobuyuki Saito 23), Yuya Kitai 24), Hiroki Takahashi 25), Iwao Kobayashi 26), Yutaka Kondo 27), Wataru Matsunaga 5), Sho Nachi 28), Toru Miike 29), Hiroshi Takahashi 30), Shuhei Takauji 31), Kensuke Umakoshi 32), Takafumi Todaka 33), Hiroshi Kodaira 34), Kohkichi Andoh 35), Takehiko Kasai 36), Yoshiaki Iwashita 37), Hideaki Arai 7), Masato Murata 38), Masahiro Yamane 39), Kazuhiro Shiga 40), Naoto Hori 41)

#### **Affiliations**

- 1) Emergency and Critical Care Center, Hokkaido University Hospital
- 2) Division of Emergency and Critical Care Medicine, Tohoku University Graduate School of Medicine
- 3) Intensive Care Unit, Department of Anesthesiology, Jikei University School of Medicine
- 4) Department of Emergency and Critical Care, Osaka General Medical Center
- 5) Department of Anesthesiology and Critical Care Medicine, Jichi medical university Saitama medical center
- 6) Department of Anesthesiology and Intensive Care Medicine, Osaka University Graduate School of Medicine
- 7) Department of Emergency Medicine, University of Occupational and Environmental Health
- 8) Clinical Research and Medical Innovation Center, Hokkaido University Hospital
- 9) Division of emergency and critical care medicine, department of acute medicine, Nihon university school of medicine
- 10) Department of Emergency & Critical Care Medicine, Ohta General Hospital Foundation Ohta

Nishinouchi Hospital

- 11) Pharmaceutical Department, JA Hiroshima General Hospital
- 12) Department of Emergency and Critical Care Medicine, Saitama Red Cross Hospital
- 13) Department of Emergency and Critical Care Medicine, Wakayama Medical University
- 14) Department of Emergency Medicine and Critical Care Medicine, Advanced Medical Emergency Department and Critical Care Center, Japan Red Cross Maebashi Hospital
- 15) Emergency and Critical Care Center, Kyushu University Hospital
- 16) Department of Emergency and Critical Care Medicine, Fukuoka University Hospital
- 17) Emergency Department, Ibaraki Prefectural Central Hospital
- 18) Division of Intensive Care, Nagasaki University Hospital
- 19) Department of Emergency and Critical Care Medicine, Tokyo Medical University, Hachioji Medical Center
- 20) Department of Emergency Medicine, Japan Red Cross Kyoto Daiichi Hospital
- 21) Intensive care unit, Saiseikai Yokohamasi Tobu Hospital
- 22) Department of Emergency Medicine, Asahikawa Medical University
- 23) Shock and Trauma Center, Nippon Medical School Chiba Hokusoh Hospital
- 24) Emergency Medicine, Kameda Medical Center
- 25) Department of Traumatology and Acute Critical Medicine, Osaka University Graduate School of Medicine
- 26) Emergency and Critical Care Medicine, Asahikawa Red Cross Hospital
- 27) Department of Emergency Medicine, Graduate School of Medicine, University of the Ryukyus
- 28) Advanced Critical Care Center, Gifu University Hospital
- 29) Emergency and critical care center, Saga University Hospital
- 30) The division of cardiovascular disease, Steel Memorial Muroran Hospital
- 31) Department of Emergency medicine and Critical Care, Sapporo City General Hospital
- 32) Department of Emergency and Critical Care Medicine, Ehime University Hospital
- 33) Intensive Care Unit, Tomishiro Central Hospital
- 34) Department of emergency medicine, Akashi City Hospital
- 35) Emergency and Critical Care Department, Sendai City Hospital
- 36) Emergency Department, Hakodate Municipal Hospital
- 37) Emergency and Critical Care Center, Mie University Hospital
- 38) Department of Emergency Medicine, Gunma university
- 39) Department of Anesthesia and Intensive Care, KKR Sapporo Medical Center

- 40) Emergency and critical care center, Seirei Mikatahara general hospital
- 41) Intensive care unit, Hyogo College of Medicine
