# Supplementary material for: The Treatment Intensity of Anticoagulant Therapy for Patients With Sepsis-Induced Disseminated Intravascular Coagulation and Outcomes: A Multicenter Cohort Study
Source: PubMed Central journal article supplement — Clin Appl Thromb Hemost. 2019 Mar 28;25:1076029619839154. doi: 10.1177/1076029619839154 (PMC6715020; doi:10.1177/1076029619839154), 2019-03-28
Supplement: Suppl_figure_2_021519_(1).pdf [file Suppl_figure_2_021519_%281%29.pdf]

**Supplemental figure 2.**

**2-1. The relationship between actual/mean predicted mortality ratio and the intensity of anticoagulant therapy in severe sepsis patients with or without DIC**

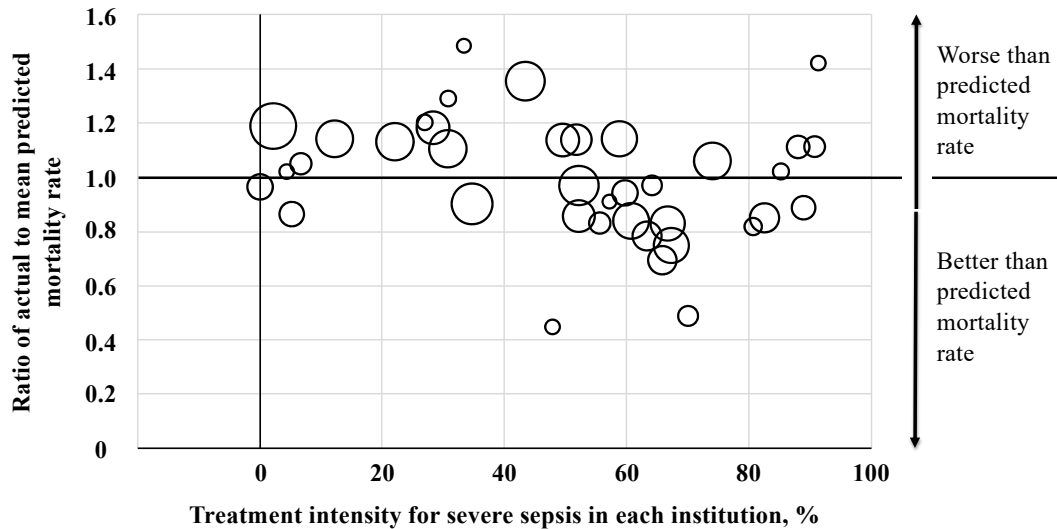

The institutions were divided into two groups according to the intensity of anticoagulant therapy in severe sepsis patients with and without DIC: >50% (high-intensity institutions) or <50% (low-intensity institutions). A significantly higher number of high-intensity institutions had an actual/mean predicted mortality ratio less than one (15 of 22, 68.2%) compared to the low-intensity institutions (4 of 16, 25.0%) (P=0.02 by Fisher exact test).

**2-2. The relationship between actual/mean predicted incidence of bleeding events ratio and the intensity of anticoagulant therapy in severe sepsis patients with or without DIC**

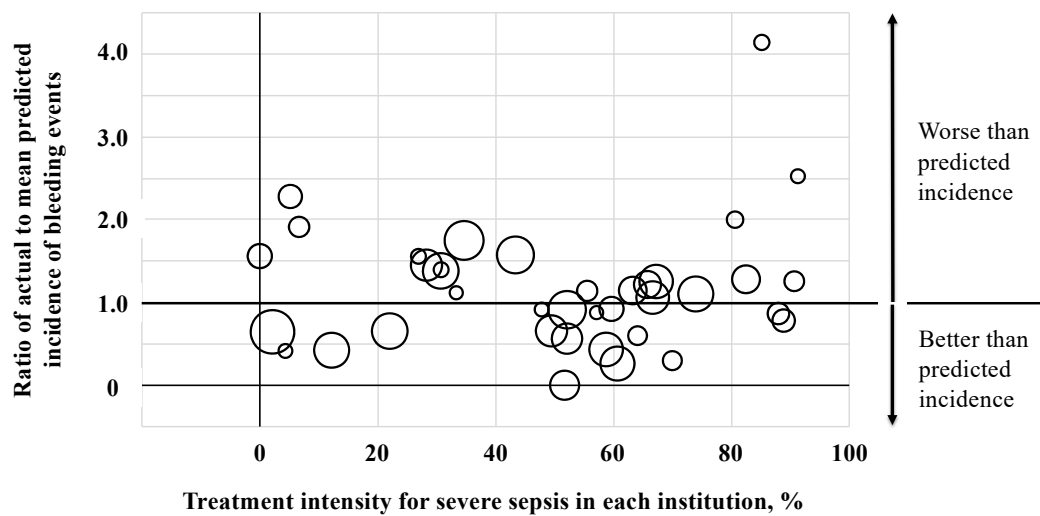

The institutions were divided into two groups according to the intensity of anticoagulant therapy in severe sepsis patients with and without DIC: >50% (high-intensity institutions) or <50% (low-intensity institutions). A number of high-intensity institutions had an actual/mean predicted incidence of bleeding events ratio less than one (12 of 22, 54.6%) was not significantly different from the low-intensity institutions (6 of 16, 37.5%) (P=0.34 by Fisher exact test).
