# Supplementary material for: The Treatment Intensity of Anticoagulant Therapy for Patients With Sepsis-Induced Disseminated Intravascular Coagulation and Outcomes: A Multicenter Cohort Study
Source: PubMed Central journal article supplement — Clin Appl Thromb Hemost. 2019 Mar 28;25:1076029619839154. doi: 10.1177/1076029619839154 (PMC6715020; doi:10.1177/1076029619839154), 2019-03-28
Supplement: Supplemental_figure_1.pdf [file Supplemental_figure_1.pdf]

**Supplemental figure 1.**

**Number of institutions and intensity of anticoagulant therapy for sepsis-induced DIC in each institution**

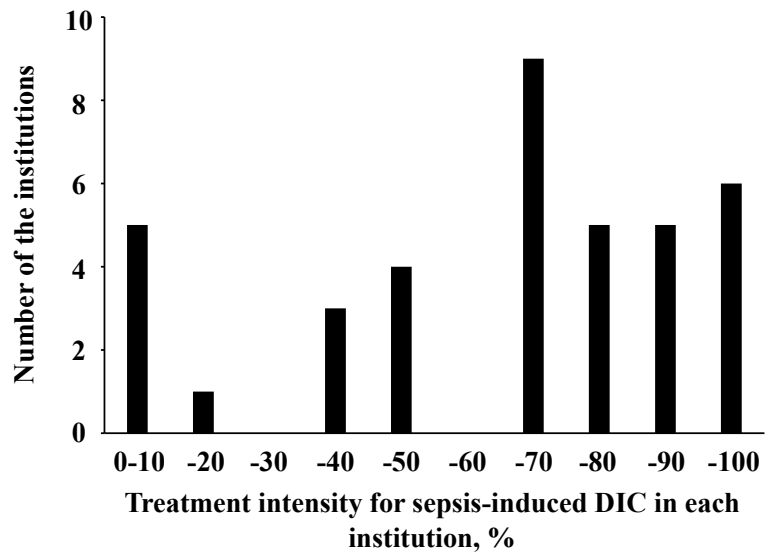

The intensity of anticoagulant therapy for sepsis-induced DIC indicates the ratio of the number of patients who received anticoagulant therapy and the number of patients with sepsis-induced DIC in each institution.

DIC, disseminated intravascular coagulation.
