# Supplementary material for: The Treatment Intensity of Anticoagulant Therapy for Patients With Sepsis-Induced Disseminated Intravascular Coagulation and Outcomes: A Multicenter Cohort Study
Source: PubMed Central journal article supplement — Clin Appl Thromb Hemost. 2019 Mar 28;25:1076029619839154. doi: 10.1177/1076029619839154 (PMC6715020; doi:10.1177/1076029619839154), 2019-03-28
Supplement: Supplemental_figure_3.pdf [file Supplemental_figure_3.pdf]

**Supplemental figure 3.**

**Actual/mean predicted ratio of bleeding events and number of the patients with sepsis-induced DIC received anticoagulant therapy**

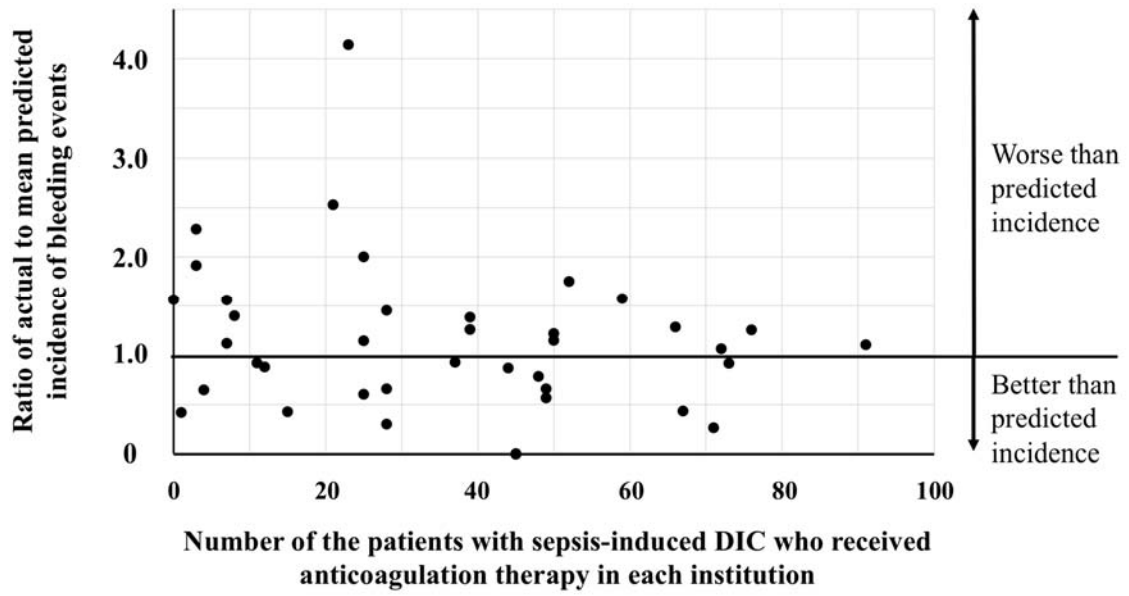

Bleeding events indicate the presence of bleeding events requiring any transfusion therapy.

DIC, disseminated intravascular coagulation.
